# Supplementary material for: Strengthening Intersectoral Collaboration to Improve Complementary Feeding Policies and Practices in Nigeria: An Ecological Systems Perspective
Source: Research Square preprint supplement (doi:10.21203/rs.3.rs-6863002/v1), 2025-07-23
Supplement: Supplementary file 1 [file e4701cdc352772c9fceb4d92.docx]

**Interview guide**

**Project title:** Strengthening Policy Implementation and Practice to Improve Complementary Feeding Policy and Practice in Nigeria Through Intersectoral Collaboration

**Introduction:**

Thank you for taking the time to speak with me. My name is Latifat Okara, and I am a final year doctoral student in health policy and leadership at Loma Linda University, California. I am conducting research on how complementary feeding policy and practice can be improved in Nigeria through intersectoral coordination and collaboration.

The goal of this discussion is to understand your perspectives on the barriers to and facilitators of complementary feeding, and roles of different stakeholders in supporting complementary feeding. The insights you provide will help identify gaps in current policies and practices and inform recommendations for improving intersectoral collaboration to enhance child nutrition in Nigeria.

This interview will take around 30 minutes. There are no incentives for participation.

**Confidentiality & Consent:**

Your responses will remain confidential, and your identity will not be disclosed in the final report unless you consent to being identified. You may skip any question or stop the interview at any time.

- Do you consent to participating in this interview?
- Do you agree to have this interview recorded for notetaking?
- The recording will be used solely for transcription and analysis and will be securely stored to protect your privacy.

**Interview Questions**

**General Questions (For all stakeholders):**

- Can you tell me about yourself and your role in relation to child nutrition and complementary feeding?
- How do you see your work contributing to improving complementary feeding practices in Nigeria?
- How long have you been involved in this work?
- What system-wide changes do you think are necessary to improve complementary feeding?
- What is your experience with complementary feeding practices in Nigeria?

## **A. Parents & Caregivers of Children Under 2 (Microsystem Level)**

1. Can you describe your daily feeding routine for your child?
2. What are your main sources of information on child feeding?
3. What challenges do you face in providing nutritious complementary foods?
4. Are there any cultural beliefs or practices that influence how you feed your child?
5. How do economic factors (e.g., food affordability, household income) impact your child’s diet?
6. What kind of support (financial, educational, social) would help you/helped you improve your child’s nutrition?
7. What role should the government, health workers, and communities play in improving complementary feeding?
8. What information or support would encourage you to change or improve your child’s diet?

## **B. Primary Health Care Workers & Community Leaders (Mesosystem Level)**

1. Can you please describe your role in promoting complementary feeding in your community?
2. What common challenges do parents face in adopting recommended complementary feeding practices?
3. How well are primary health care workers trained to support complementary feeding?
4. What gaps exist in health system support for caregivers regarding child nutrition?
5. What challenges do you face in reaching rural or underserved communities with complementary feeding interventions?
6. How do you collaborate with other sectors (e.g., agriculture, education, social protection) to improve child nutrition?
7. In your opinion, how effective is the collaboration between health care and other sectors (e.g., agriculture, education) in improving child nutrition?
8. What strategies have been effective in promoting better complementary feeding in your community?
9. What improvements would you suggest in primary health care to better support complementary feeding?

## **C. Policymakers & Food System Experts (Macrosystem Level)**

1. How does the current policy environment support complementary feeding in Nigeria?
2. How do current national child nutrition policies align with global recommendations, and what challenges exist in their implementation?
3. What intersectoral collaborations currently exist to improve complementary feeding?
4. How is the implementation of complementary feeding policies monitored, and what challenges exist in tracking outcomes?
5. What gaps or inconsistencies exist in national policies that impact the implementation of complementary feeding practices?
6. How well do food systems support access to nutritious, affordable complementary foods?
7. What barriers exist in collaboration between sectors such as health, agriculture, and social protection to support complementary feeding?
8. What policy or programmatic interventions could strengthen complementary feeding practices in Nigeria?
9. How can intersectoral collaboration be improved to ensure complementary feeding policies implementation?
10. Are there successful models from other countries or regions that Nigeria could adapt to improve complementary feeding? If so, could you describe them? What makes these models successful?

# **Closing Questions (For All Stakeholders)**

1. If you could change one policy or practice to improve complementary feeding practices in Nigeria, what would it be?
2. Do you have any additional thoughts or recommendations?

**Wrap-up:**

Thank you for sharing your insights. Your contribution is invaluable to this research.

- Is it okay to contact you if I need further clarification or additional insights?
- Would you like to receive a copy of the research paper once it is completed?
